# Supplementary material
Source: PubMed Central journal article supplement (PMC6187642)
Supplement: supp_RA118.004102_138333_2_supp_188052_pdrtnz.pdf [file supp_RA118.004102_138333_2_supp_188052_pdrtnz.pdf]

ACTIVE MITOCHONDRIA SUPPORT OSTEOGENIC DIFFERENTIATION VIA  $\beta$ -CATENIN  
 Brianna H. Shares<sup>1</sup>, Melanie Busch<sup>1</sup>, Noelle White<sup>1</sup>, Laura Shum<sup>1</sup>, and Roman A. Eliseev<sup>1,\*</sup>

Supplementary Figure S1:

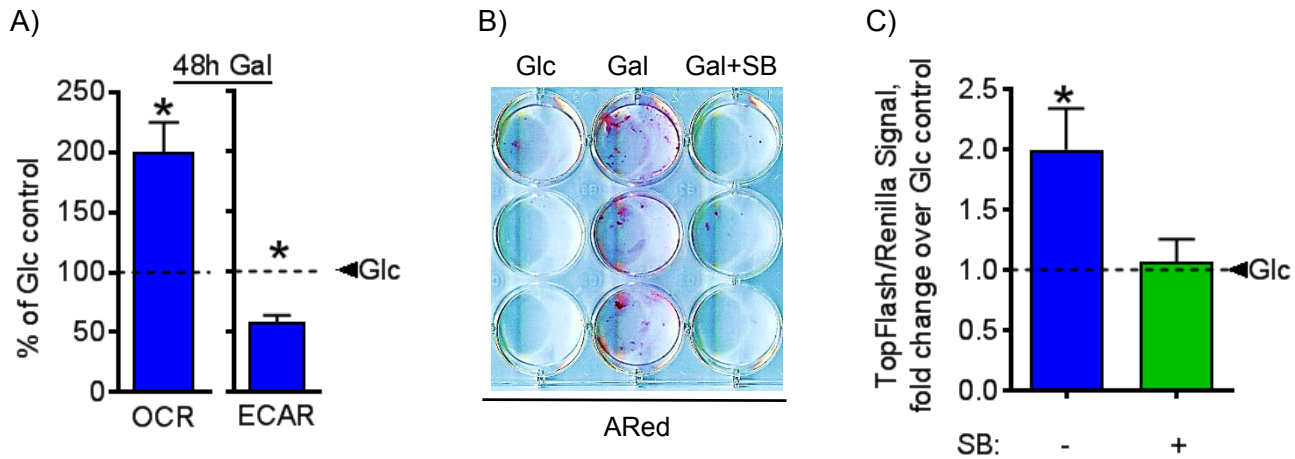

**Figure S1. Inducing mitochondrial OxPhos by replacing media glucose with galactose stimulates  $\beta$ -catenin and osteogenesis in MC3T3 cells.** MC3T3 E1 cells were incubated with galactose for 48 hours and then assessed. Treatment with galactose resulted in an increase in OCR accompanied by a decrease in ECAR, indicating a reliance on mitochondrial OxPhos in galactose media (A). Activation of OxPhos by replacing media glucose with galactose was sufficient to increase mineralization measured with Alizarin Red (ARed) staining (B) and  $\beta$ -catenin activity measured with TopFlash reporter (C). These effects were reversed by inhibition of ACLY with SB204990 (SB). Dashed line indicates glucose control. Data are means  $\pm$ SEM, n=3-6, \* p < 0.05 compared to 48 hour glucose control. Glc: glucose (control), Gal: galactose.
